# Supplementary material for: Microstructure and electrochemical properties of high performance graphene/manganese oxide hybrid electrodes
Source: Royal Society of Chemistry journal article supplement (doi:10.1039/d1ra05323j), 2021-01-01
Supplement: d1ra05323j1.pdf [file d1ra05323j1.pdf]

## **Microstructure and electrochemical properties of high performance graphene/manganese oxide hybrid electrodes**

Fatima Hamade,<sup>a</sup> Emmy Radich,<sup>a,b</sup> and Virginia A. Davis<sup>a</sup>

<sup>a</sup> *Department of Chemical Engineering, Auburn University, Auburn, AL*

<sup>b</sup> *Infiltrator Water Technologies*

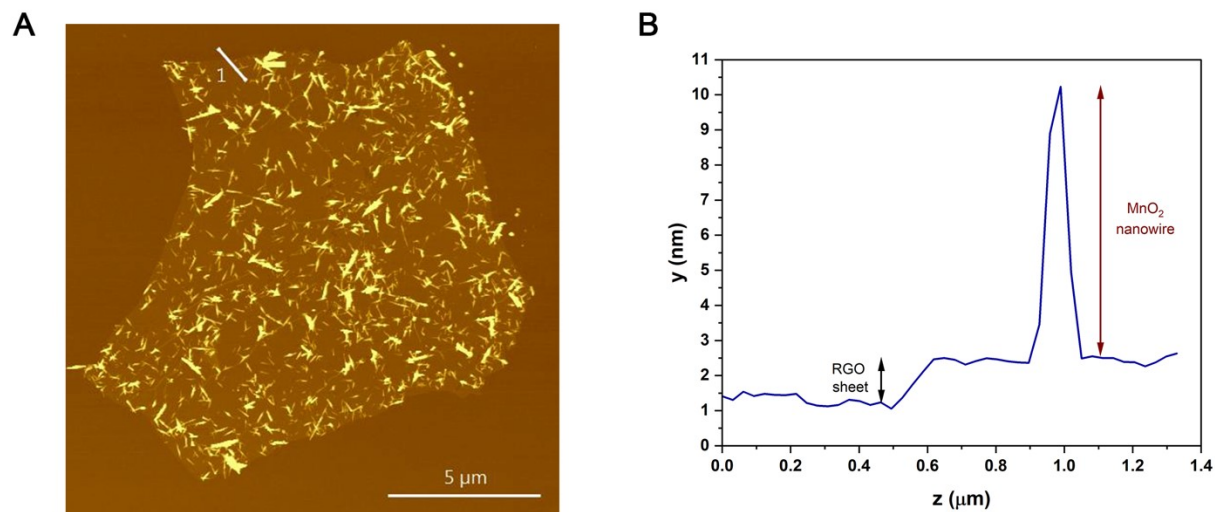

Figure S1. (a) AFM of 3H hybrid with the marking (1) near the top left of the hybrid used to analyze (b) the z-height profile where the RGO sheet diameter (thickness) is  $\sim 1$  nm and MnO<sub>2</sub> nanowire diameter (thickness) is  $\sim 9$  nm.

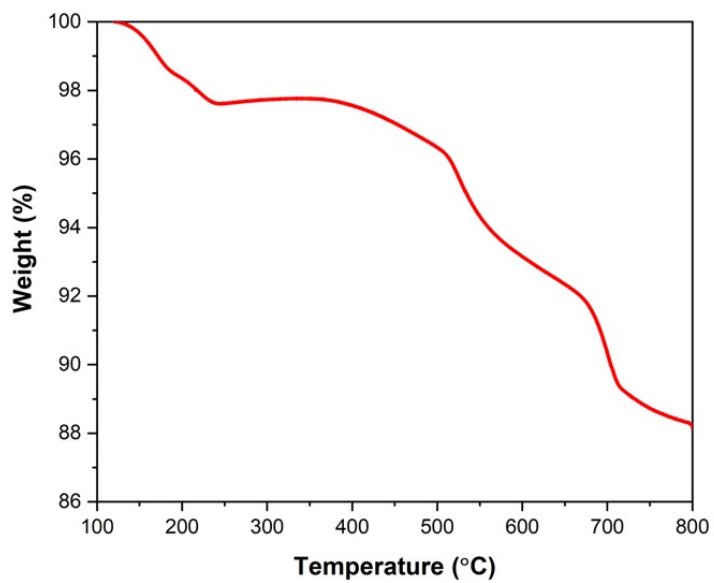

Figure S2. TGA curve of the degradation of MnO<sub>2</sub>.

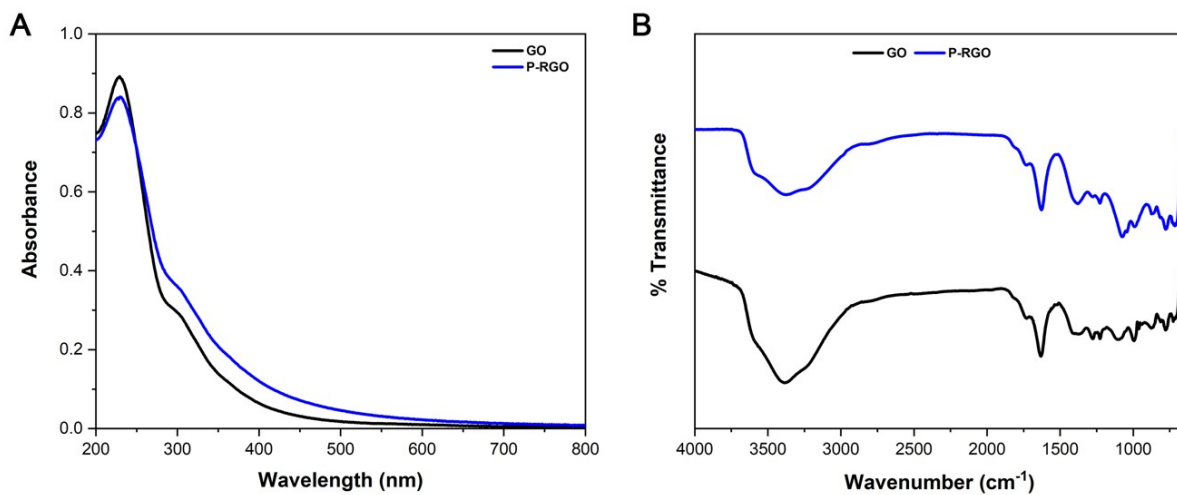

Figure S3. To analyze if the graphene oxide is reduced through the hybrid synthesis, GO was subject to the same conditions in the synthesis without addition of the reacting agent. (a) UV-vis and (b) FTIR spectroscopy were performed and demonstrate a partially reduced graphene oxide (P-RGO).

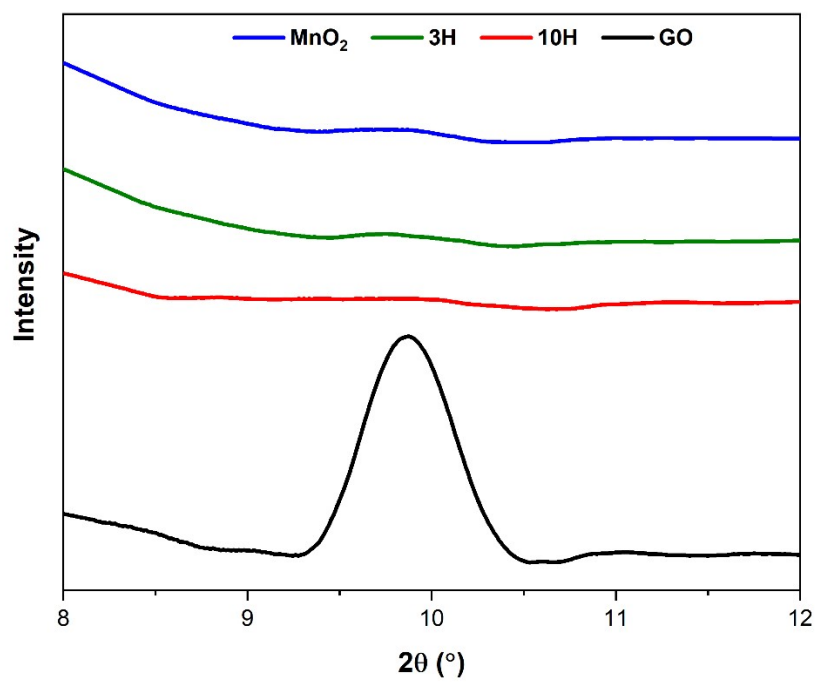

Figure S4. XRD showing the hybrids do not exhibit a peak at the low  $2\theta$  angles, suggesting the graphene oxide (GO) that goes through the hybrid synthesis results in a reduced graphene oxide (RGO) structure.

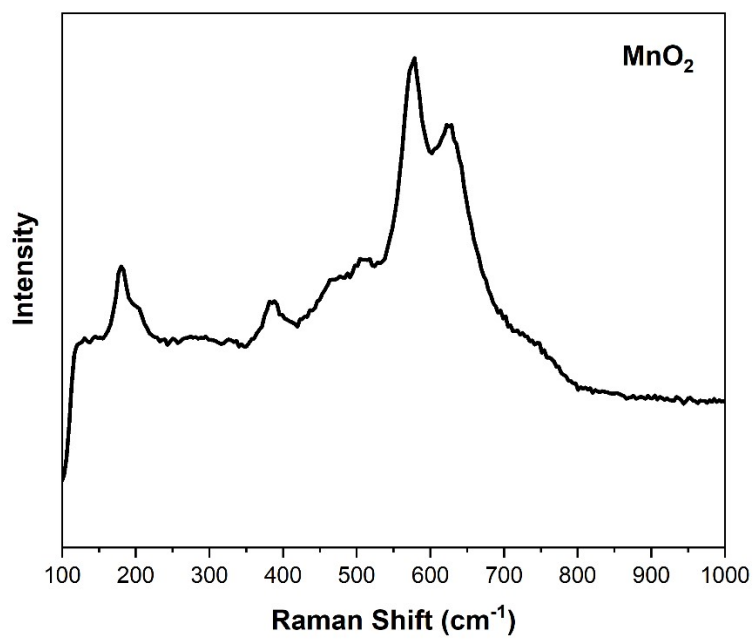

Figure S5. Raman spectrum of MnO<sub>2</sub> magnified at low Raman shifts.

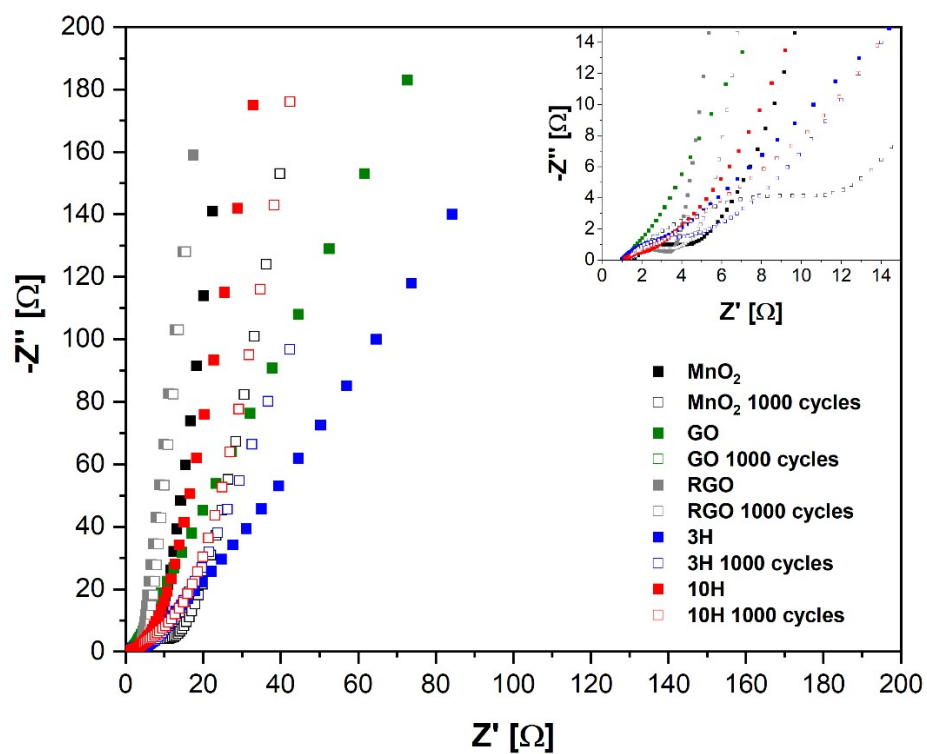

Figure S6. EIS after 1 (closed squares) and 1000 (open squares) CV cycles performed at 20 mV/s.
